# Supplementary material for: Insights Into Heat Response Mechanisms in Clematis Species: Physiological Analysis, Expression Profiles and Function Verification
Source: Research Square preprint supplement (doi:10.21203/rs.3.rs-338667/v1), 2021-03-26
Supplement: Supplementary file 1 [file defeb5071fd7a5d4f6ee7c8d.xlsx]

## Sheet: Sheet1
qRT-PCR
CvUBC2D-F	TTCTGAAGGAACTCAAGGAT
CvUBC2D-R	TGCGTAGGGACTATCTGG
CvHSFA2-1-F	CAGACTGAAGAGGGATCGCAA
CvHSFA2-1-R	GGAGAAATTCTGGATTCTTGATA
CvHSFA2-2-F	AGTTTTATTGTTTGGGACTTGCC
CvHSFA2-2-R	ATTAGCGAACTCCCATCTGTC
CvHSFB2b-F	CAGTTATCTGTAATGCTTCCAAT
CvHSFB2b-R	CATCTACCAGGCACAATCTTT
VIGS for N. benthamiana
NbHSFA2-2-TRV2-1-F	TGAGTAAGGTTACCGAATTCCCTCCTTTTCTGAGCAAGA
NbHSFA2-2-TRV2-1-R	GACATGCCCGGGCCTCGAGTGTCTGACGAAGCTGGAGAA
NbHSFA2-2-TRV2-2-F	TGAGTAAGGTTACCGAATTCGGTTTCAGGAAGGTTGATCC
NbHSFA2-2-TRV2-2-R	GACATGCCCGGGCCTCGAGCTGCTGCTGTTTCAACTCAA
Prokaryotic expression
PET28a-CvHSFA2-2-F	CAAATGGGTCGCGGATCCATGATCAAGGAGGAAGATGTTGT
PET28a-CvHSFA2-2-R	TGCGGCCGCAAGCTTGTCGACCGGCTTTGGCCCAAGGCAACCCATC
Eukaryotic expression
AD-CvHSFA2-2-F	ATGGCCATGGAGGCCAGTGAATTCATGATCAAGGAGGAAGATGTTGT
AD-CvHSFA2-2-R	CTGCAGCTCGAGCTCGATGGATCCTCACGGCTTTGGCCCAAGGCAAC
